# Supplementary material
Source: MDPI journal article supplement (https://www.mdpi.com/2073-4344/11/10/1177)
Supplement: s1 [file s1]

# **Supplementary data: Gamma carbonic anhydrases from hydrothermal vent bacteria: Cases of alternating active site due to a long loop with proton shuttle residue**

**Colleen Varaidzo Manyumwa<sup>1</sup> and Özlem Tastan Bishop<sup>1\*</sup>**

<sup>1</sup> Research Unit in Bioinformatics (RUBi), Department of Biochemistry and Microbiology, Rhodes University, Grahamstown, 6140, South Africa; colleen.manyumwa06@gmail.com; O.TastanBishop@ru.ac.za

\*Correspondence: O.TastanBishop@ru.ac.za; Tel: +27-46-603-8072; Fax: +27-46-603-7576



Table S1: Motifs generated by MEME, their positions in the  $\gamma$ -CAs, and their respective E-values.

| Organism         | Motif number and E-value         |                                  |                                  |                                  |                                  |                                  |                                  |                                 |                                 |
|------------------|----------------------------------|----------------------------------|----------------------------------|----------------------------------|----------------------------------|----------------------------------|----------------------------------|---------------------------------|---------------------------------|
|                  | <b>1</b><br>1.9e <sup>-178</sup> | <b>2</b><br>1.9e <sup>-160</sup> | <b>3</b><br>1.3e <sup>-159</sup> | <b>4</b><br>2.0e <sup>-129</sup> | <b>5</b><br>3.1e <sup>-135</sup> | <b>6</b><br>2.6e <sup>-118</sup> | <b>7</b><br>3.2e <sup>-107</sup> | <b>8</b><br>6.7e <sup>-54</sup> | <b>9</b><br>1.3e <sup>-41</sup> |
| $\gamma$ -CmCA   | 90-109                           | 37-56                            | 133-154                          | 111-130                          | 57-76                            | 155-174                          | 16-35                            | 1-15                            | 79-89                           |
| $\gamma$ -EpCA   | 89-108                           | 37-56                            | 132-153                          | 110-129                          | 57-76                            | 154-173                          | 16-35                            | 1-15                            | 78-88                           |
| $\gamma$ -HtCA   | 89-108                           | 37-56                            | 132-153                          | 110-129                          | 57-76                            | 154-173                          | 16-35                            | 1-15                            | 78-88                           |
| $\gamma$ -LnCA   | 90-109                           | 37-56                            | 133-154                          | 111-130                          | 57-76                            | 155-174                          | 16-35                            | 1-15                            | 79-89                           |
| $\gamma$ -NpCA   | 90-109                           | 37-56                            | 133-154                          | 111-130                          | 57-76                            | 155-174                          | 16-35                            | 1-15                            | 79-89                           |
| $\gamma$ -NsbCA  | 89-108                           | 37-56                            | 132-153                          | 110-129                          | 57-76                            | 154-173                          | 16-35                            | 1-15                            | 78-88                           |
| $\gamma$ -NtCA   | 89-108                           | 37-56                            | 132-153                          | 110-129                          | 57-76                            | 154-173                          | 16-35                            | 1-15                            | 78-88                           |
| $\gamma$ -PhCA   | 84-103                           | 39-58                            | 127-148                          | 105-124                          | 59-78                            | 149-168                          | 18-37                            | 3-17                            | —                               |
| $\gamma$ -PmCA   | 84-103                           | 39-58                            | 127-148                          | 105-124                          | 59-78                            | 149-168                          | 18-37                            | 3-17                            | —                               |
| $\gamma$ -SaCA   | 89-108                           | 37-56                            | 132-153                          | 110-129                          | 57-76                            | 154-173                          | 16-35                            | 1-15                            | 78-88                           |
| $\gamma$ -SiCA   | 89-108                           | 37-56                            | 132-153                          | 110-129                          | 57-76                            | 154-173                          | 16-35                            | 1-15                            | 78-88                           |
| $\gamma$ -SNbcCA | 89-108                           | 37-56                            | 132-153                          | 110-129                          | 57-76                            | 154-173                          | 16-35                            | 1-15                            | 78-88                           |
| $\gamma$ -TtkCA  | 81-100                           | 36-55                            | 124-145                          | 102-121                          | 56-75                            | 146-165                          | 15-34                            | —                               | —                               |

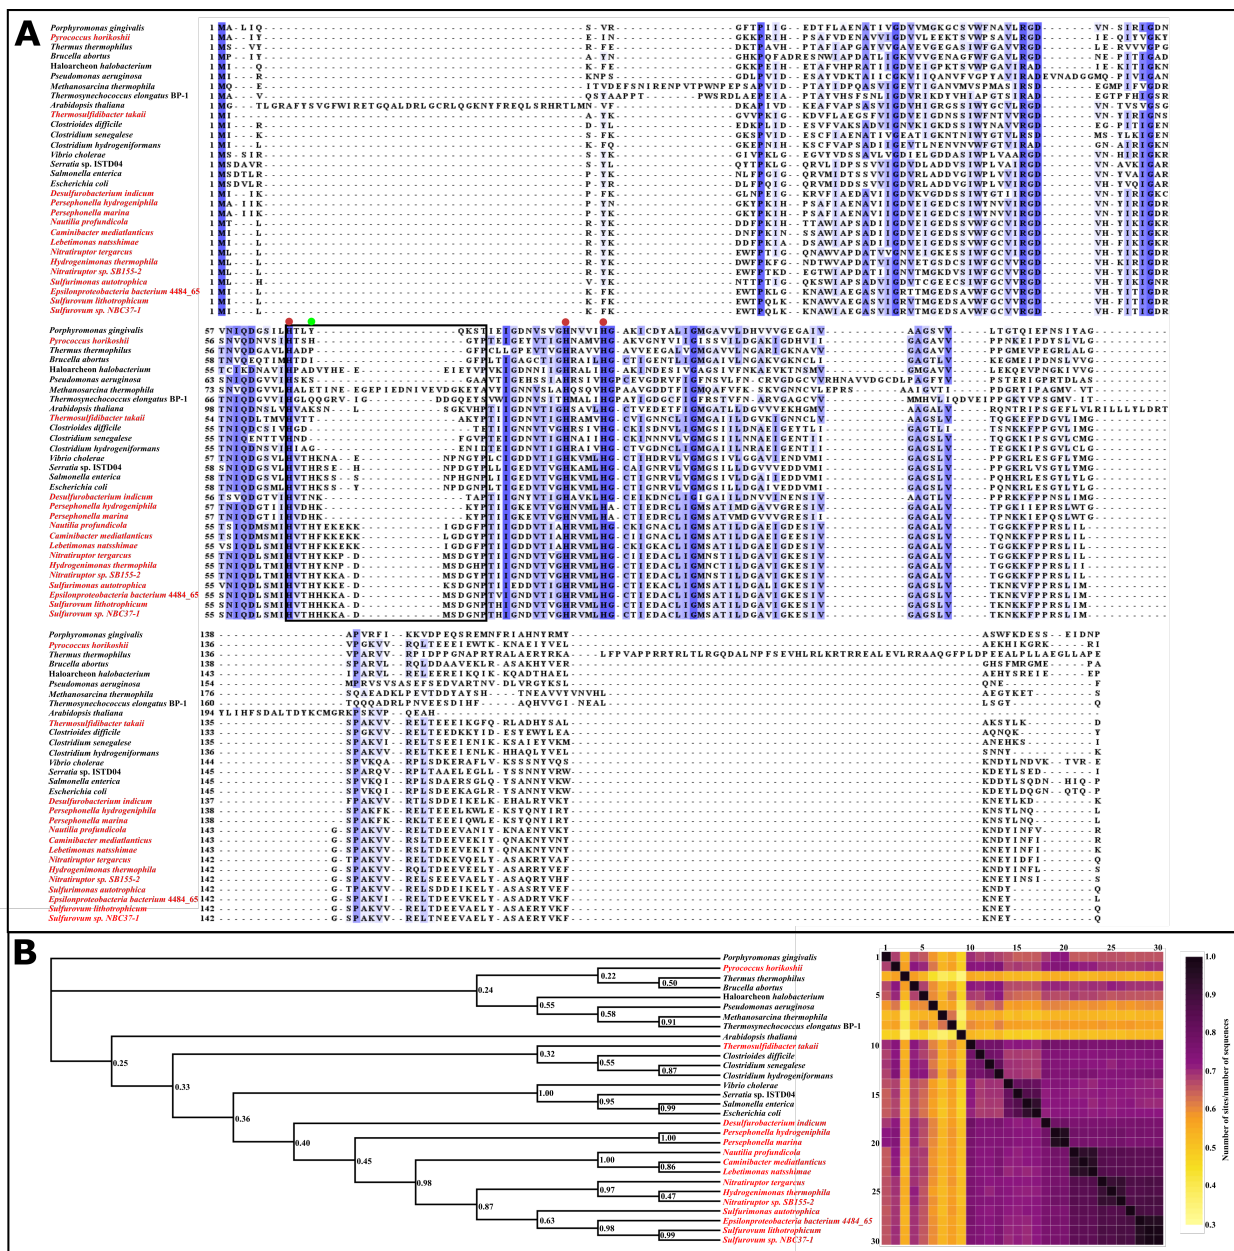

Figure S2: **A:** Multiple sequence alignment of  $\gamma$ -CAs from hydrothermal vent organisms as well as  $\gamma$ -CAs from other environments used to create the phylogenetic tree in B. The black box shows the variable loop containing the His proton shuttle. The red circles show the  $\text{Zn}^{2+}$  coordinating residues and the green circle shows the position of the His proton shuttle. Sequences from hydrothermal vents are labelled in red. **B:** Phylogenetic tree constructed for  $\gamma$ -CA sequences from hydrothermal vent organisms as well as  $\gamma$ -CAs from other environments, alongside the pairwise sequence identity heatmap. The Maximum Likelihood method was applied using the LGGI protein model with 95% gap deletion and the bootstrap values are displayed as percentages of 1000 bootstraps on the branch nodes.

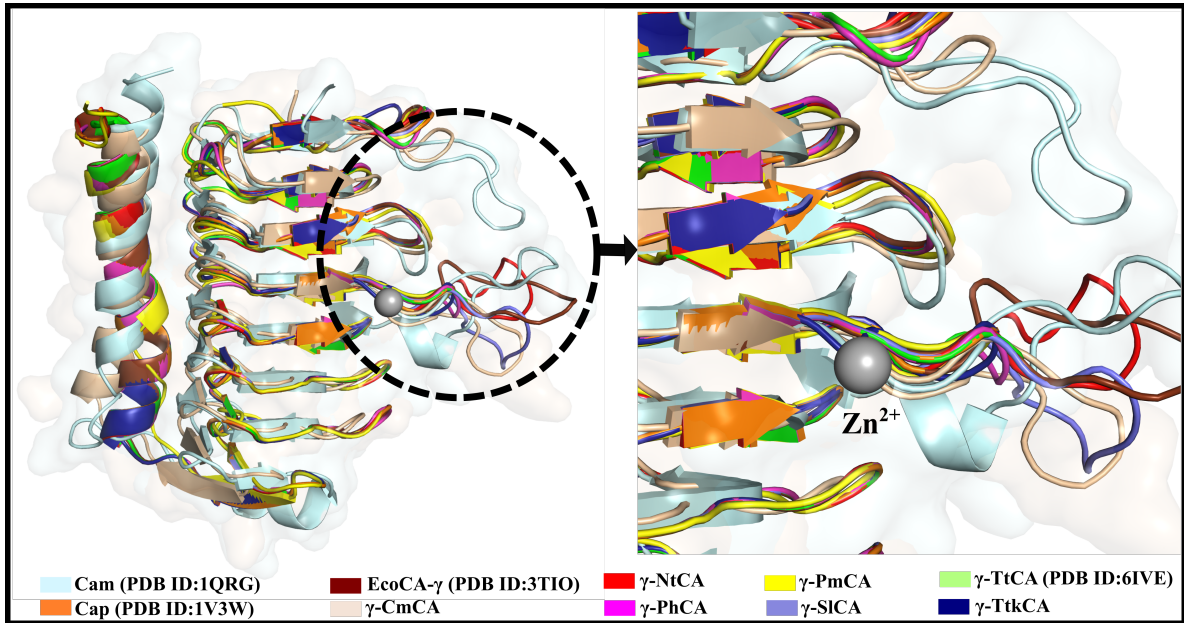

Figure S3: Monomer structure alignment of  $\gamma$ -CAs from *Methanosarcina thermophila* (Cam, PDB ID: 1QRL, cyan), *Pyrococcus horikoshii* (Cap, PDB ID: 1V3W, orange), *Escherichia coli* (EcoCA- $\gamma$ , UniProtKB Accession number: P0A9W9.1, brick red), *Caminibacter mediatlanticus* ( $\gamma$ -CmCA, wheat), *Nitratiruptor tergarcus* ( $\gamma$ -NtCA, red), *Persephonella hydrogeniphila* ( $\gamma$ -PhCA, magenta), *Persephonella marina* ( $\gamma$ -PmCA, yellow), *Sulfurovum lithotrophicum* ( $\gamma$ -SICA, slate blue), *Thermus thermophilus* ( $\gamma$ -TtCA, PDB ID: 6IVE, green) and *Thermosulfidibacter takaii* ( $\gamma$ -TtkCA, navy blue). The variable loop region containing the proton shuttling residue is shown in the black dotted circled and zoomed in the image pointed to by the black arrow.

Table S2: Template coverage, sequence identity and model validation for  $\gamma$ -CA sequences.

| CA               | Template PDB ID | Sequence identity (%) | Sequence coverage (%) | z-Dope score | Verify3D (%) | ProSA (z-score) | PROCHECK                 |                      |
|------------------|-----------------|-----------------------|-----------------------|--------------|--------------|-----------------|--------------------------|----------------------|
|                  |                 |                       |                       |              |              |                 | Most favoured region (%) | Disallowed region(%) |
| $\gamma$ -CmCA   | 1V3W            | 46                    | 98                    | -1.32        | 85.3         | -6.35           | 88.56                    | 0.6                  |
| $\gamma$ -EpCA   |                 | 42                    | 99                    | -1.42        | 84.2         | -6.19           | 89.0                     | 0.2                  |
| $\gamma$ -HtCA   |                 | 41                    | 98                    | -1.44        | 83.2         | -6.35           | 88.1                     | 0.9                  |
| $\gamma$ -LnCA   |                 | 46                    | 98                    | -1.23        | 84.7         | -6.55           | 90.2                     | 0.7                  |
| $\gamma$ -NpCA   |                 | 47                    | 99                    | -1.24        | 83.2         | -6.21           | 90.2                     | 0                    |
| $\gamma$ -NsbCA  |                 | 40                    | 98                    | -1.31        | 87.1         | -6.53           | 88.6                     | 1.3                  |
| $\gamma$ -NtCA   |                 | 41                    | 99                    | -1.33        | 80.15        | -6.29           | 87.6                     | 1.1                  |
| $\gamma$ -SaCA   |                 | 41                    | 100                   | -1.53        | 86.8         | -5.95           | 88.5                     | 0                    |
| $\gamma$ -SICA   |                 | 44                    | 98                    | -1.34        | 81.2         | -6.72           | 87.4                     | 0.7                  |
| $\gamma$ -SNbcCA |                 | 43                    | 100                   | -1.33        | 83.3         | -6.57           | 88.3                     | 0.2                  |

Table S3: Interface characteristics obtained from PDBePISA of the trimeric  $\gamma$ -CA structures.

| Carbonic anhydrase | Number of hydrogen bonds | Salt bridges | Buried surface area/ $\text{\AA}^2$ | Total surface area/ $\text{\AA}^2$ | % BSA |
|--------------------|--------------------------|--------------|-------------------------------------|------------------------------------|-------|
| Cam                | 60                       | 18           | 7,458.6                             | 28,398                             | 26.2  |
| EcoCA- $\gamma$    | 26                       | 18           | 4,805.4                             | 25,496                             | 18.8  |
| $\gamma$ -CmCA     | 23                       | 11           | 5,461.2                             | 26,737                             | 20.4  |
| $\gamma$ -EpCA     | 14                       | 8            | 4,578.6                             | 25,602                             | 17.9  |
| $\gamma$ -HtCA     | 30                       | 12           | 5,886.4                             | 26,261                             | 22.4  |
| $\gamma$ -LnCA     | 28                       | 9            | 5,495.4                             | 26,405                             | 20.8  |
| $\gamma$ -NpCA     | 22                       | 12           | 5,630.8                             | 26,678                             | 21.1  |
| $\gamma$ -NsbCA    | 27                       | 12           | 6,031.0                             | 25,834                             | 23.3  |
| $\gamma$ -NtCA     | 24                       | 9            | 6,023.8                             | 26,829                             | 22.5  |
| $\gamma$ -SaCA     | 18                       | 10           | 5,072.6                             | 25,176                             | 20.1  |
| $\gamma$ -SICA     | 13                       | 10           | 4,847.6                             | 25,537                             | 19.0  |
| $\gamma$ -SNbcCA   | 15                       | 11           | 5,087.2                             | 26,007                             | 19.6  |

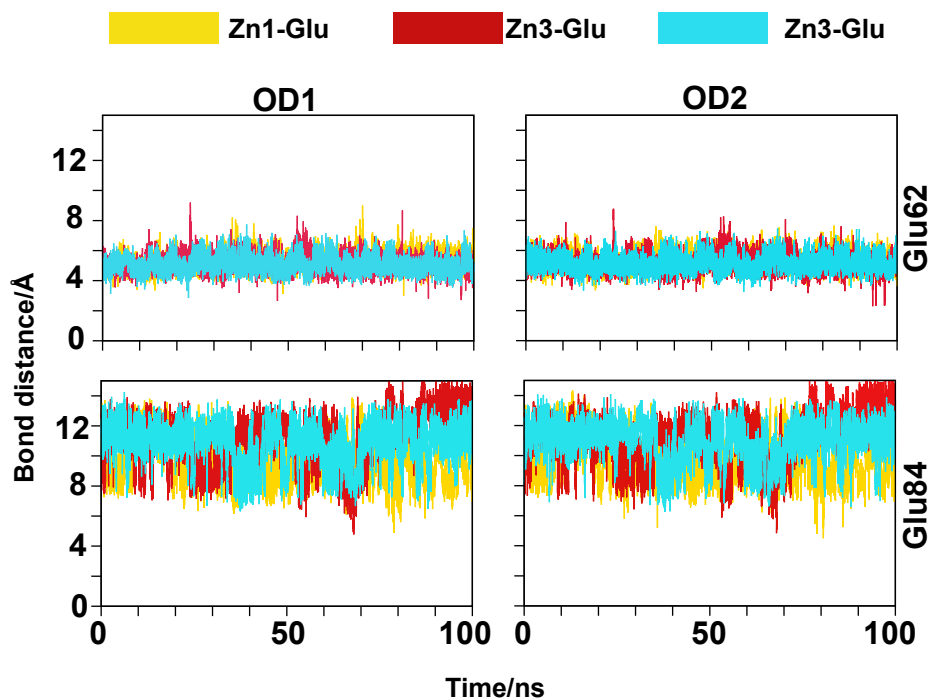

Figure S4: Bond distance between  $\text{Zn}^{2+}$  and proton shuttling residues Glu62 (top) and Glu84 (bottom) in Cam's three active sites during the 100 ns simulation. Distances were measured for both oxygen atoms, OD1 and OD2, which are capable of coordinating the  $\text{Zn}^{2+}$ .
